# Supplementary material for: Rhenium and technetium complexes that bind to amyloid-β plaques
Source: Royal Society of Chemistry journal article supplement (doi:10.1039/c4dt02969k), 2014-12-02

PREPRINT

## Supplementary information for Rhenium and Technetium Complexes for Diagnostic Imaging of Amyloid- $\beta$ Plaques in Alzheimer's Disease

David J. Hayne,<sup>a,b</sup> Andrea J. North,<sup>a,b</sup> Michelle Fodero-Tavoletti,<sup>c,e</sup>  
Jonathan M. White,<sup>a,b</sup> Lin W. Hung,<sup>b</sup> Angela Rigopoulos,<sup>e</sup> Catriona A.  
McLean,<sup>c,f</sup> Paul A. Adlard,<sup>c</sup> Uwe Ackermann,<sup>e</sup> Henri Tochon-Danguy,<sup>e</sup>  
Victor L. Villemagne,<sup>c,e</sup> Kevin J. Barnham<sup>b,c,d</sup> and Paul S. Donnelly<sup>\*a,b</sup>.

**Figure S1:** Tissue sections from the frontal cortex from age matched control subjects ( $\times 10$  magnification). Images on the left are immunohistologically stained using 1E8 antibody and viewed by bright-field microscopy. The matching adjacent slides treated with the rhenium complex and viewed by epifluorescence microscopy are on the right ( $\lambda_{\text{ex}}=359$  nm,  $\lambda_{\text{em}}=461$  nm).

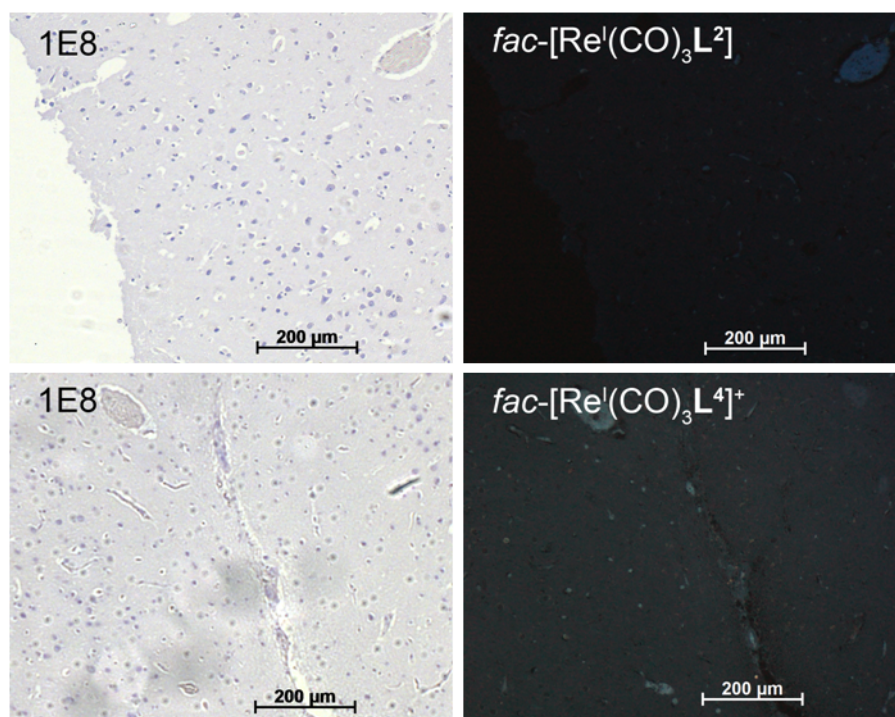

Supplement: c4dt02969k1.pdf [file c4dt02969k1.pdf]
